# Supplementary material for: Hydroxide ion conduction in molybdenum(vi)-doped tin pyrophosphate at intermediate temperatures
Source: Royal Society of Chemistry journal article supplement (doi:10.1039/c3ta10769h), 2013-01-01
Supplement: c3ta10769h.pdf [file c3ta10769h.pdf]

## **Supplementary Information**

### **Hydroxide Ion Conduction in Molybdenum(VI) or Tungsten(VI)-Doped Tin Pyrophosphate at Intermediate Temperatures**

Takashi Hibino\* and Kazuyo Kobayashi

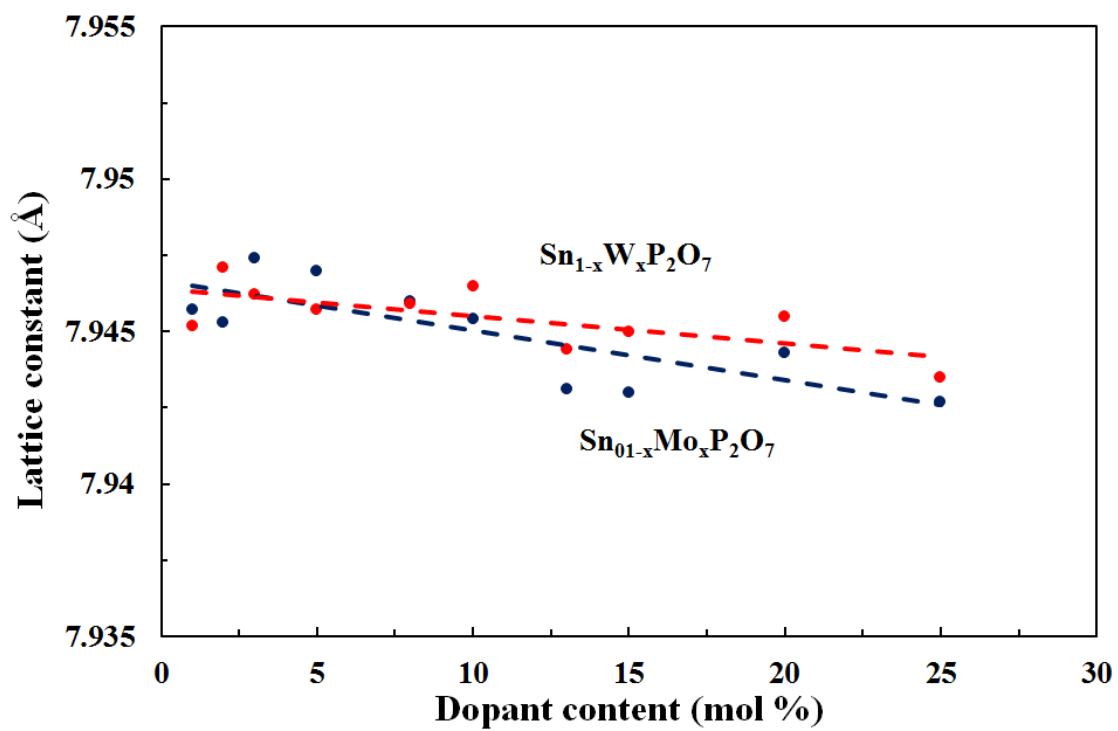

Fig. S1. Lattice constants for  $\text{Sn}_{1-x}\text{Mo}_x\text{P}_2\text{O}_7$  and  $\text{Sn}_{1-x}\text{W}_x\text{P}_2\text{O}_7$ .

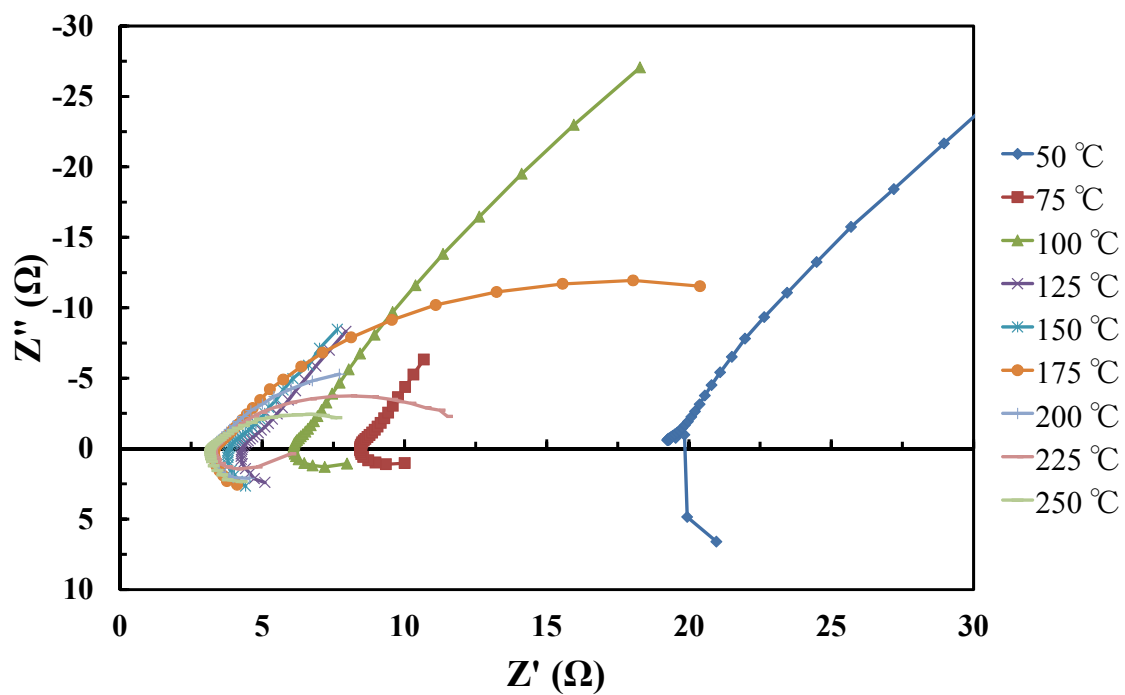

Fig. S2. Impedance spectra for  $\text{Sn}_{0.85}\text{Mo}_{0.15}\text{P}_2\text{O}_7$ .

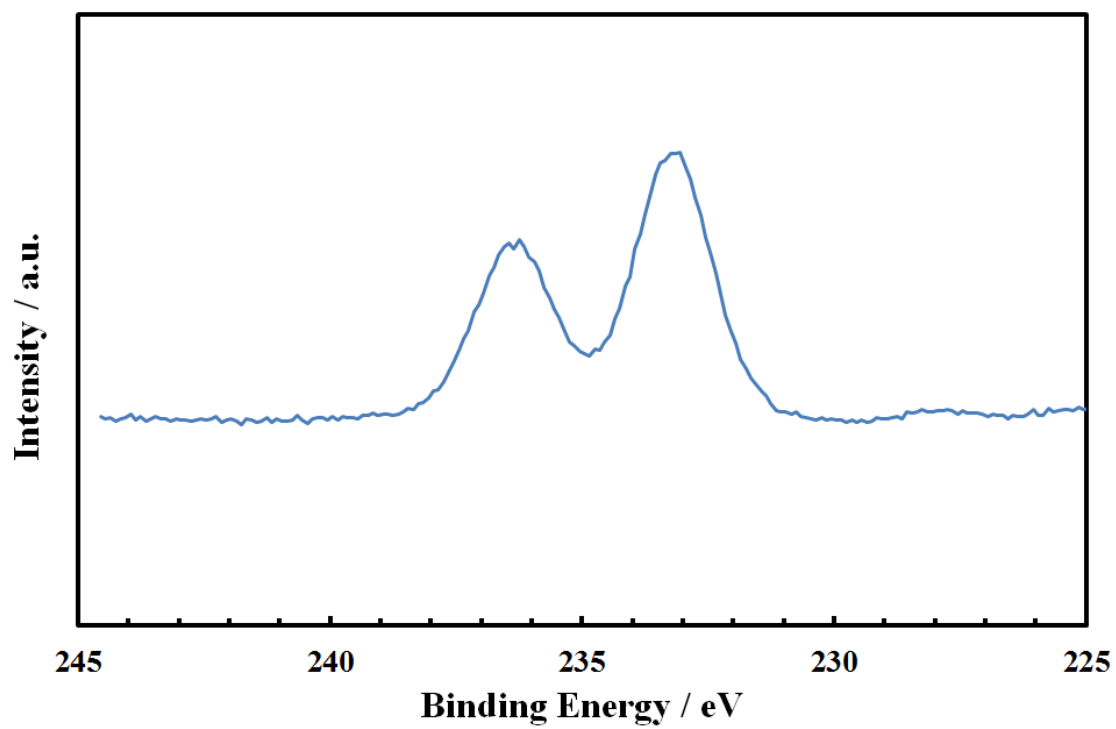

Fig. S3. XPS spectrum for  $\text{Sn}_{0.85}\text{Mo}_{0.15}\text{P}_2\text{O}_7$ .

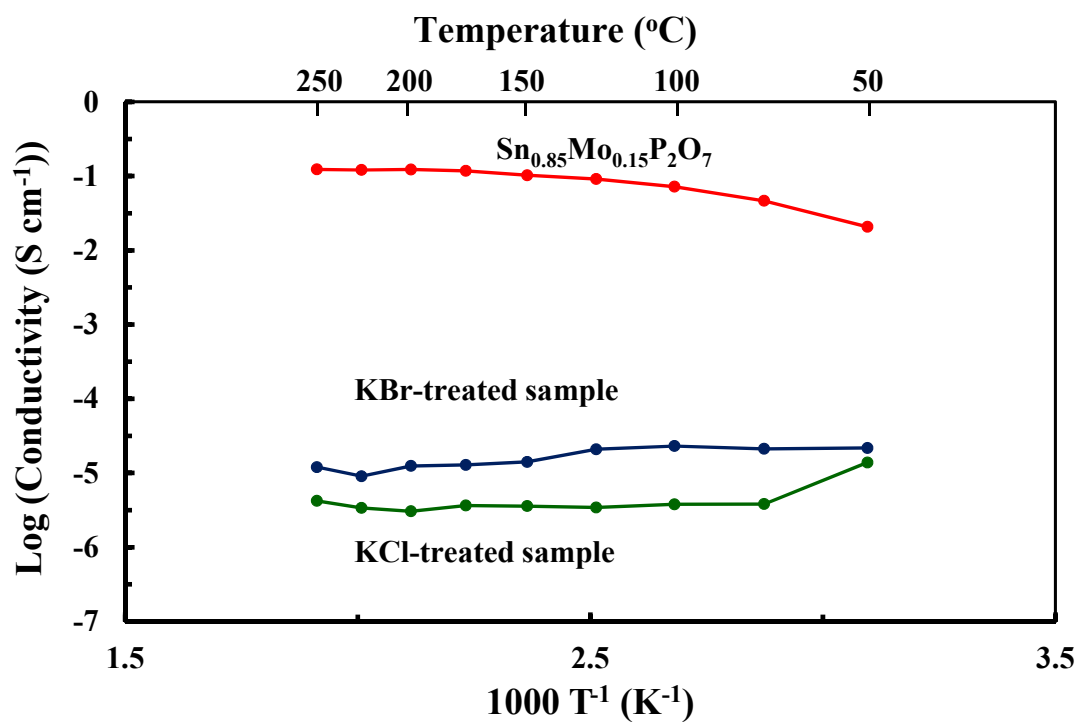

Fig. S4. Temperature dependence of conductivity for KCl or KBr-treated  $\text{Sn}_{0.85}\text{Mo}_{0.15}\text{P}_2\text{O}_7$ .

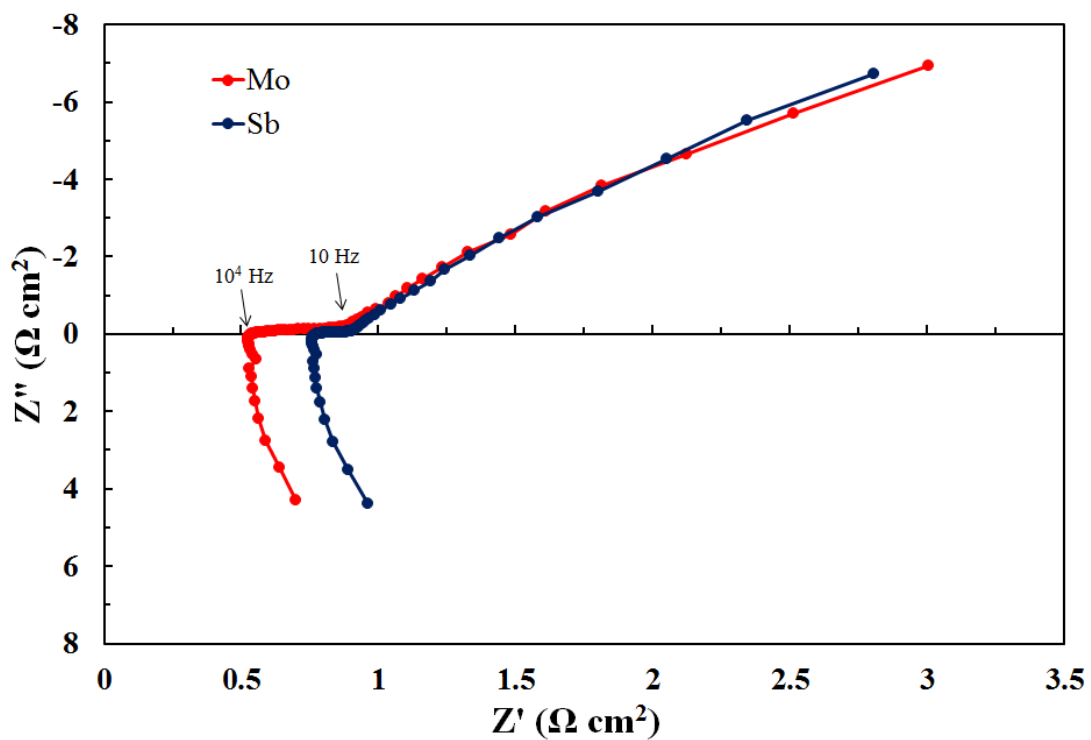

Fig. S5. Impedance spectra for fuel cells with the  $\text{Sn}_{0.85}\text{Mo}_{0.15}\text{P}_2\text{O}_7$  and  $\text{Sn}_{0.92}\text{Sb}_{0.08}\text{P}_2\text{O}_7$  electrolytes under open-circuit conditions at 150 °C.

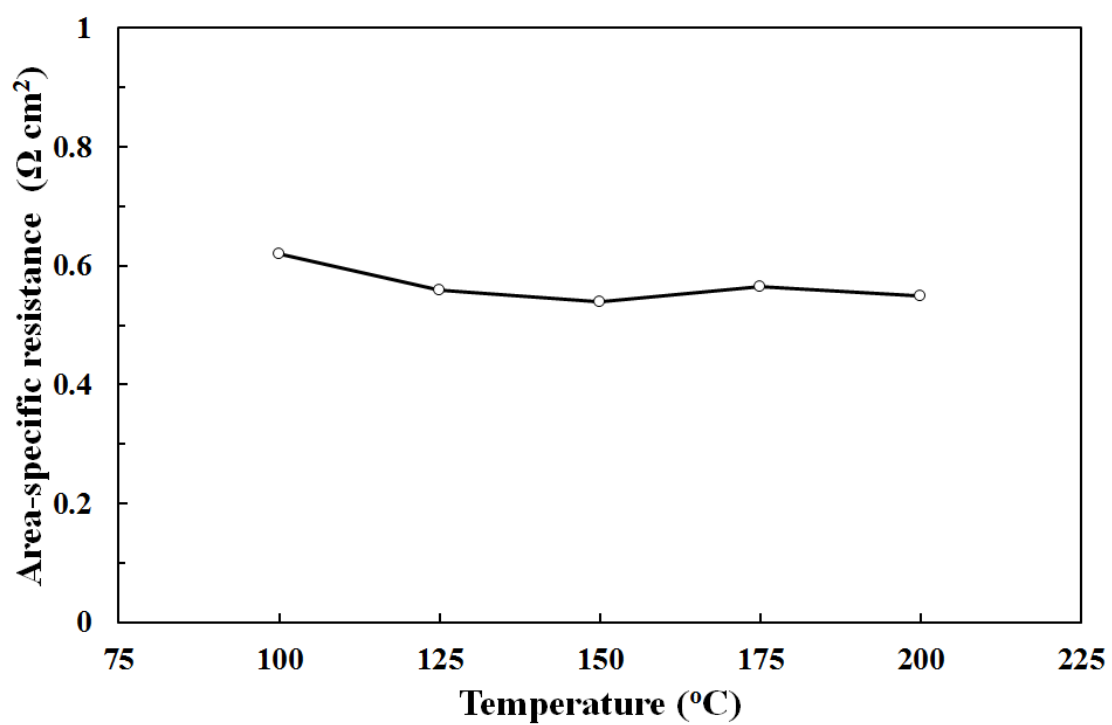

Fig. S6. Area-specific resistance for a  $\text{Sn}_{0.85}\text{Mo}_{0.15}\text{P}_2\text{O}_7$  electrolyte at various temperatures.
